# Supplementary material for: Isolation and Characterization of CsWRKY7, a Subgroup IId WRKY Transcription Factor from Camellia sinensis, Linked to Development in Arabidopsis
Source: PubMed Central journal article supplement (PMC6600228; doi:10.3390/ijms20112815), 2019-06-09
Supplement: ijms-20-02815-s001.pdf [file ijms-20-02815-s001.pdf]

Supplemental Table S1 Primer sequences used for qRT-PCR

| Genes          | Sense primer (5'→3')     | Anti-sense primer (5'→3') |
|----------------|--------------------------|---------------------------|
| <i>GAPDH</i>   | TTGGCATCGTTGAGGGTCT      | CAGTGGGAACACGGAAAGC       |
| <i>CsWRKY7</i> | TCGTGATGGGGAAGAATGGA     | CGACGAAGGCTGCTTGCTAT      |
| <i>Actin-2</i> | TGTGCCAATCTACGAGGGTTT    | TTTCCCGCTCTGCTGTTGT       |
| <i>SCO1</i>    | ATGGTGAGGGGCAAACTCAG     | CCCAATGAACAATTGCGTCTC     |
| <i>LFY</i>     | TTGGTGGTTTAGAGGGACTATTCG | GCCGTAAAACCTAACTCCGCTA    |
| <i>AP1</i>     | AACCAAGGCCACAATATGCC     | CGGGTTCAAGAGTCAGTTCG      |
| <i>CO</i>      | GTGATAAGGATGCCAAGGAG     | AGTTTAAGCGGAACAACCTCTA    |
| <i>FLC</i>     | CTCTACAGCTTCTCCTCCGG     | TCCCACAAGCTTGCTATCCA      |
| <i>FT</i>      | TACGAAAATCCAAGTCCCCTG    | AAACTCGCGAGTGTTGAAGTTC    |
| <i>FLM</i>     | GATAGAAGCGCTGTTCAAGC     | CAGCAACGTATTCTTTCCCAT     |
